# 1 Humans use minimum cost movements in a whole-body 2 task

3 Lijia Liu<sup>c,b</sup>, Dana Ballard<sup>c</sup>

4 *<sup>a</sup>Department of Computer Science, The University of Texas at Austin, Austin, TX,  
5 78712, US*

6 *<sup>b</sup>Lead Contact*

7 *<sup>c</sup>Corresponding Author Email: [lijialiu@cs.utexas.edu](mailto:lijialiu@cs.utexas.edu)*

## 8 **Abstract**

9 Humans have elegant bodies that allow gymnastics, piano playing, and  
10 tool use, but understanding how they do this in detail is difficult because  
11 their musculoskeletal systems are extraordinarily complicated. Nonetheless,  
12 although movements can be very individuated, some common movements like  
13 walking and reaching can be stereotypical, with the movement cost a major  
14 factor. A recent study has extended these observations by showing that in  
15 an arbitrary set of whole-body movements used to trace large-scale closed  
16 curves, near-identical posture changes were chosen across different subjects,  
17 both in the average trajectories of the body's limbs and in variations within  
18 trajectories. The commonality of that result motivates explanations for this  
19 generality. One could be that humans also choose trajectories that are eco-  
20 nomical in energetic cost. To test this hypothesis, we situate the tracing  
21 data within a fifty degree of freedom dynamic model of the human skele-  
22 ton that allows the computation of movement cost. Comparing the model  
23 movement cost data from nominal tracings against various perturbed trac-

24 ings shows that the latter are more energetically expensive, inferring that  
25 the original traces were chosen on the basis of minimum cost. Moreover,  
26 the computational approach used to establish minimum cost principle sug-  
27 gests a refinement of what is known about cortical movement representations.

28

29 **Keywords:** Posture analysis, whole body movement, virtual tracing, kine-  
30 matic representation, movement variation costs

## 31 **Author Summary**

32 Although motor cortical areas have been extensively studied, their basic  
33 response properties are still only partially understood, and it remains con-  
34 troversial whether neural activity relates to muscle commands or to abstract  
35 movement features. We provide a new perspective of how movements may  
36 be resented in the brain by showing that humans chose trajectories with  
37 minimum energy cost while accomplishing goal-directed tasks. Furthermore,  
38 most of the current neural control studies are experimental. Our compu-  
39 tational methodology coupled with a minimum energy principle suggests a  
40 refinement of the brain’s storage of remembered movements.

## 41 **1. Introduction**

42 Advances in the speed of computing and novel formulations of the dy-  
43 namic equations of motion have engendered a new methodology for un-  
44 derstanding human movement fundamentals. Large-scale human musculo-  
45 skeletal models have be built with the objective of understanding human  
46 real time goal-oriented behaviors [1, 2]. These newer models linearize the  
47 dynamic equations and use feed-forward integrations that are much better  
48 conditioned than previous methods.

49 However, including all the complexity of the human musculoskeletal sys-  
50 tem, with over 600 muscles controlling a complex skeletal system with over  
51 300 degrees of freedom can be daunting, espicially if the goal is to generate  
52 movements as compared to analyze their properties. Moreover, to achieve its

53 control complexity, the brain coordinates several cooperating neural subsys-  
54 tems. In addition to its vast cortical motor memory system, the forebrain  
55 coordinates specialized subsystems such as the Basal Ganglia, and Thalamus  
56 and Cerebellum in realizing continuous real-time movement [3]. The upshot  
57 is that research progress tends to be specialized [4] and there are many open  
58 problems [5].

59 In the face of these challenges, one modeling route is to forego the level  
60 of detail that includes muscles and model more abstract versions of the hu-  
61 man system that still use multiple degrees of freedom but summarize mus-  
62 cle effects through joint torques. The computation of the dynamics of such  
63 multi-jointed systems recently has also experienced significant advances. The  
64 foremost of these, use a kinematic plan to directly integrate the dynamic  
65 equations. Several different systems exist, such as MuJoCo, Bullet, Havok,  
66 ODE and PhysX, but an evaluation by [6] found them roughly comparable  
67 in capability, and only MuJoCo [7] has been applied to human modeling.

68 Thus there is a place for a exclusively human movement based model  
69 that could be used to inform laboratory experiments[8], clinical studies e.g  
70 [9] and also verify experiments that have only qualitative results[10, 11]. Our  
71 human dynamic model has a singular focus on human movement modeling  
72 and features a unique approach to integrating the dynamic equations. We  
73 have developed a direct dynamics integration method to extract torques from  
74 human subjects in real time [12, 13, 14] based on a unifying spring constraint  
75 formalism.

76 Our focus is the principles behind *large-scale arbitrary movements*, partic-  
77 ularly with respect to variations between different subjects. Thus we eschew  
78 common movements such as reaching and walking [15, 16, 17] and also stud-  
79 ies of small-scale grasping movements [18, 19]. Another peripheral issue is for  
80 us that that many movement tasks can have objectives that discourage low  
81 energetic solutions but can be readily analyzed with decision-making tech-  
82 niques [20, 21, 22, 23] that focus on repeatability; movements are committed  
83 to memory with precedence based on the probability of use.

84 Our experimental setting starts with measuring the kinematics of a move-  
85 ment. The model divides anatomical parts into discrete segments that have  
86 their own inertia and are interconnected to other segments by joints that  
87 are mostly rotary. Thus a movement can be described as the time course  
88 of the coordinates of the joints. The The model’s state is indexed by fifty  
89 three-dimensional coordinates of a motion capture suit. The time course  
90 of these coordinates provides an equivalent representation of a movement’s  
91 kinematics.

92 To refer to the kinematics at a specific time we use the term *posture*.  
93 Classically, posture classically is used for particular poses such as sitting or  
94 standing, but we use it for arbitrary body orientations.

95 Although computing torques in the inverse dynamics using kinematics is  
96 an advance, the study of the kinematics of arbitrary body movements is in  
97 itself challenging to study owing to their variation. Bernstein’s famous well-  
98 known phrase characterizing repeated movements in terms of “repetition

99 without repetition,” emphasizes that repeated movements are never exactly  
100 the same [24]. However repeated movement variations are never completely  
101 random. Informed by task goals, subjects can shape the variations in different  
102 parts of the body by co-contracting muscles to achieve desired dynamics in  
103 different sections of a trajectory [25]. Thus in looking for regularities in  
104 movements one has to deal with both that the trajectories will vary owing  
105 to muscle co-contraction and that the amount of co-contraction itself can be  
106 modulated throughout the movements.

107 These variations, we developed specialized aggregation methods for data  
108 analysis that extracted similarities of posture sequences in the face of kine-  
109 matic variations [26]. The task studied had subjects tracing large-scale three  
110 dimensional curves in virtual reality that required a series of whole-body  
111 movement sequences. Subjects could freely choose their starting posture  
112 and also were given no instructions as to how to comport themselves during  
113 the tracing process. Their postures were continuously recorded using the  
114 motion-capture system.

115 The main result was that although the locations tracing data exhibits pos-  
116 ture variations, both in repeated of a single subject and in trials by different  
117 subjects, the average postures show marked regularities in several aspects of  
118 the data that was subject to analysis. A t-test between a proximal relative  
119 posture and distal relative posture showed that the difference is significant  
120 at the 0.0001 level. Also, the variances in the subjects’ postures were cor-  
121 related. If at a point on the curve the variance of a trace calculated from a

122 subject was relatively large, the average of the variance of all the repeated  
123 trials from all subjects would be relatively large also.

124 The obvious inference from all the observed common movements is that  
125 energetic cost should be similar and moreover, these observations arise from  
126 a minimum cost principle. To test this hypothesis we computed the cost  
127 of dynamic models of different subjects' curve traces and compared these  
128 results with the cost of tracing under two different perturbations. In one,  
129 the trajectories' cost were computed with small perturbations in the model  
130 kinematic positions. In the other the original curves that were displaced in  
131 five-centimeter increments. The result of both of these comparisons was that  
132 the means the energetic cost of were higher than those of the original curve.  
133 These results strongly suggest that that movements can be selected on the  
134 basis of predicted minimum cost.

135 The human system has a broad dichotomy into a lateral system, which  
136 includes the cortical component commands, and a medial system, which in-  
137 cludes the vestibular component commands. Crudely one can think of the  
138 lateral system as handling predictions and the medial feedback system han-  
139 dling feedback.

140 Our model also exhibits these two components. The dynamic calculations  
141 are good enough to handle the majority of the torques required, but various  
142 inaccuracies in the model require a residual torques such as that would be  
143 produced by a vestibular system. Our residual system, is unsophisticated as  
144 described in the sections section, but it does an essential job in achieving

145 balance.

## 146 **2. Background**

147 A general principle of human movement is that our nervous system prefers  
148 trajectories that are economical in energetic cost [27, 28]. It has been estab-  
149 lished for decades and has been well studied. For example, in locomotion,  
150 there are a number of experiments showing that humans' walking speed [29],  
151 step frequency/length [30, 31, 32, 33, 34, 35, 36], and step width [37, 38]  
152 are all corresponding with the minimum metabolic cost, e.g., energetic cost  
153 exhibits a U-shaped dependence on step frequency while walking at a con-  
154 stant speed and the minimum of the U-shape curve is consistent with the  
155 self-selected or preferred walking frequency [17, 34]. Furthermore, new ev-  
156 idences [39, 40, 41] show the nervous system can adapt preferred gaits to  
157 minimize energetic cost.

158 In the past, a common way to address this minimization principle was to  
159 conduct experiments comparing walking or running with many other strange  
160 and unpractised gaits [42, 43]. Nowadays, there are three commonly used  
161 methods to study energy optimization.

162 The most straightforward and frequently used method is to measure the  
163 metabolic cost, e.g., subjects breath through a mouthpiece to measure rates  
164 of oxygen consumption ( $VO_2$ ). For example, subjects were required to walk  
165 under different circumstances, and the results showed that the metabolic cost  
166 was minimum while subjects walked at the condition which was "comfort-



167 able” for them [29, 30, 31, 32, 39, 40, 41].

168 Measure the changes in muscle coactivation and stiffness using Elec-  
169 tromyographic (EMG) is considered a common way to reflect metabolic  
170 changes. An experiment [44] proved that that subjects’ metabolic cost re-  
171 duced during the learning process of arm reaching tasks, and their muscle  
172 activities and coactivation would parallel changes in metabolic power.

173 The third method is to build a mechanics-based model and determine if  
174 the predicted minimum mechanical cost correlates with people’s preferences.  
175 A basic understanding of trajectory choice can be obtained by calculating  
176 energy cost by using minimal dynamic models, such as two-link or three-link  
177 arm models [45, 46], inverted pendulum walking models [33, 34, 35, 37],  
178 bounce running models [47]. For example, use the inverted pendulum model  
179 to predict the optimal step length and compare it with the subjects’ real step  
180 length. However, most of the experiments used two-dimensional models and  
181 studied human part-body motions in the sagittal plane, such as study leg  
182 motions using an inverted pendulum model or arm reaching using a 3-link  
183 model.

184 We conducted a whole-body virtual tracing experiment showing that both  
185 the movement’s posture trajectories and its kinematic variations showed  
186 striking commonalities across subjects [26]. One possible principle of ex-  
187 planations for this generality could be that humans choose trajectories that  
188 are economical in energetic cost. To prove it, we need to compute the cost of  
189 virtual tracing movements. One possible way is to use the VO2 method to

190 measure the metabolic cost or use the EMG to measure the muscle coactivation  
191 and stiffness directly. However, subjects had already worn a VR helmet  
192 on their face during the tracing tasks. Besides, motion-capture suits covered  
193 their whole body thus there was no exposed skin for EMG electrodes.  
194 Another possible way is to build a dynamic model. However, as we mentioned  
195 above, those models were built to simulate part of the human body  
196 in two-dimensions.

197 We further searched for methods to build a dynamic bipedal robot by  
198 modeling the whole body with a skeleton of rigid segments connected with  
199 joints. The simplest bipedal robot uses three links to represent the torso and  
200 two legs in the sagittal plane [48, 49]. Five-link biped robots extend the  
201 model using two links to represent each leg [50, 51, 52, 53], while seven-link  
202 biped robots further extend it by adding feet to it [54, 55]. Those models  
203 have three different states: (1) open-linked – one foot on the ground, (2)  
204 closed-linked – two feet on the ground, (3) both feet in the air. Each state  
205 corresponds to a different set of motion equations. Most researchers use  
206 open-linked models [48, 49, 50, 51, 52, 53, 54, 55]. They assumed that once  
207 one foot laid to the ground, the other foot would be lifted immediately.

208 Recently, 3D modeling of biped robots [56, 57] have been developed as  
209 well, however, they are still not sophisticated enough compared with a real  
210 human body. A real human can be considered as a 21 hierarchical link  
211 humanoid robot with 48 degrees of freedom. Furthermore, because the model  
212 can have three different states during a continuous motion, such as running,

213 it is hard for an optimization algorithm performing gradient descent for three  
214 different sets of equations that happened alternatively. Therefore, The third  
215 method described above is also not fitting for our problem: 1) it is too  
216 expensive to build a dynamic model with motion equations, 2) it is too hard  
217 to use an optimization algorithm to predict the optimal path for a model  
218 with three different dynamic states that happened alternatively.

219 We developed a novel way to compute the energy cost of human move-  
220 ments by building a dynamic human model [58, 13] on the top of a physical  
221 engine – Open Dynamic Engine (ODE)<sup>1</sup>. This dynamic human model works  
222 as follows:

- 223 1. Forward kinematics: it simulates human motion by following the mo-  
224 tion capture data
- 225 2. Inverse kinematics: it calls the ODE built-in functions to compute the  
226 joint angles and joint angular velocities at each frame.
- 227 3. Forward dynamics: it simulates human motion based on the computed  
228 joint properties.
- 229 4. Inverse dynamics: it calls the ODE built-in function to compute the  
230 required joint torques.

231 At each joint, instantaneous power was computed from the product of  
232 net joint torque and joint angular velocity. The work performed at each

---

<sup>1</sup><https://www.ode.org/>

233 joint were determined by numerically integrating the instantaneous powers  
234 over the entire tracing task. In this way, given motion capture data, we  
235 can compute the energy cost without building a humanoid biped robot with  
236 motion equations. The validation of this dynamic model has been proved in  
237 the paper [58, 13].

238 While doing the virtual tracing experiment, subjects could freely choose  
239 their starting posture and were given no instructions on how to comport  
240 themselves during the tracing process. Therefore, we could consider subjects  
241 traced curves under the conditions which were "comfortable" for them. Ac-  
242 cording to the previous experiments [29, 30, 31, 32, 39, 40, 41], the metabolic  
243 cost of movements with those trajectories should be the minimum. To prove  
244 it, we perturbed the trajectories and computed the energy cost. As expected,  
245 the metabolic cost increased more or less.

### 246 **3. Results**

247 Using the kinematic data from [26], we scaled the dynamic model to each  
248 of the nine subjects and had the models trace of the nine curves of variations  
249 of difficulty that are shown in Fig. 1. The energy cost of tracing paths showed  
250 marked regularities in the following aspects of the data that was subject to  
251 analysis:

- 252 1. Analysis of the joints' power while tracing path1 across different sub-  
253 jects showed that although the absolute cost of the movements may

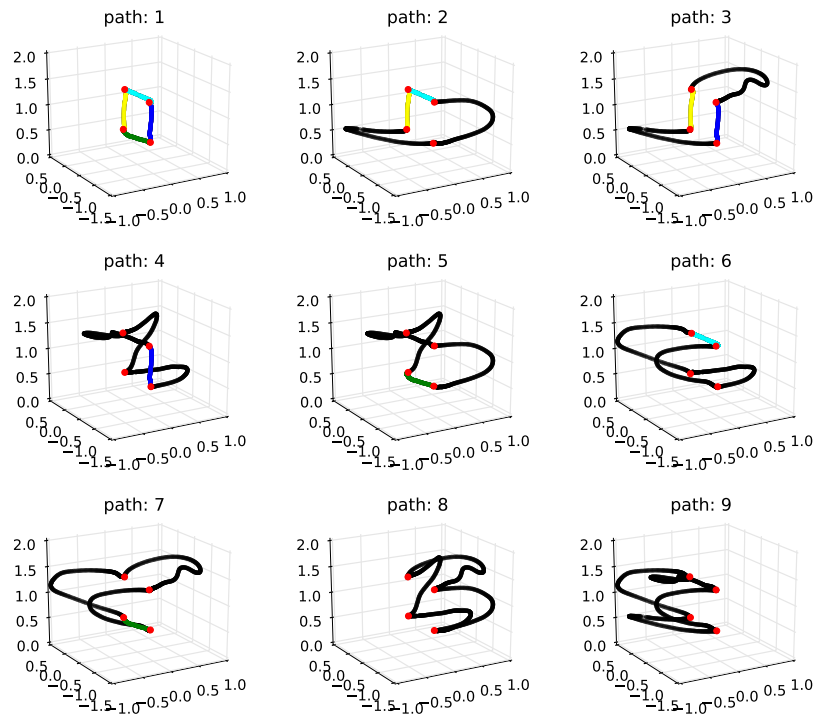

Figure 1: **The nine 3-dimensional paths in the virtual environment that were used in the experiment.** They are ordered by their complexity. For reference, colors denote common segments and points. For the subjects, the paths were all rendered in black, The scale is in meters.

- 254 vary between subjects, the cost is qualitatively very similar. (See sec-  
255 tion 3.1, Figure 2);
- 256 2. The computation of average energy cost while tracing path1 showed the  
257 corresponding residual forces were relatively small. (See section 3.1,  
258 Figure 3 and Figure 4);

- 259 3. The costs of tracing each path by each subject, normalized by body  
260 weight, are very similar and scaled with the length of the paths. (See  
261 section 3.2 and Figure 5);
- 262 4. Although there are variations in the cost across the repeated traces,  
263 the cost of using the perturbed model parameters is significantly higher  
264 than the original. (See section 3.2, Figure 6 Figure 7, and Figure 8);
- 265 5. The increment of energy cost while using perturbed model parameters  
266 distributes more on the joints' cost than on the residual component.  
267 (See section 3.2 and Figure 9);

### 268 3.1. *Energy cost analysis of tracing path1*

269 **The mean of total power across different participants.** As an initial  
270 analysis we established the variations in the costs of each curve exhibited  
271 by different subjects. A representative result is shown in Fig.2 for path  
272 one. The plot shows the total power at each frame for each subject. The  
273 trace reveals that the subjects have to put more effort into the trace at the  
274 same times. Thus although the absolute cost of the movements may vary  
275 between subjects, the costs during the traces are qualitatively very similar.  
276 [58] showed different participants used similar postures sequence while tracing  
277 the same curves from kinematic perspective. Here, the similarity of the power  
278 pattern along frames across different subjects reinforces this conclusion from  
279 a dynamics perspective[59].

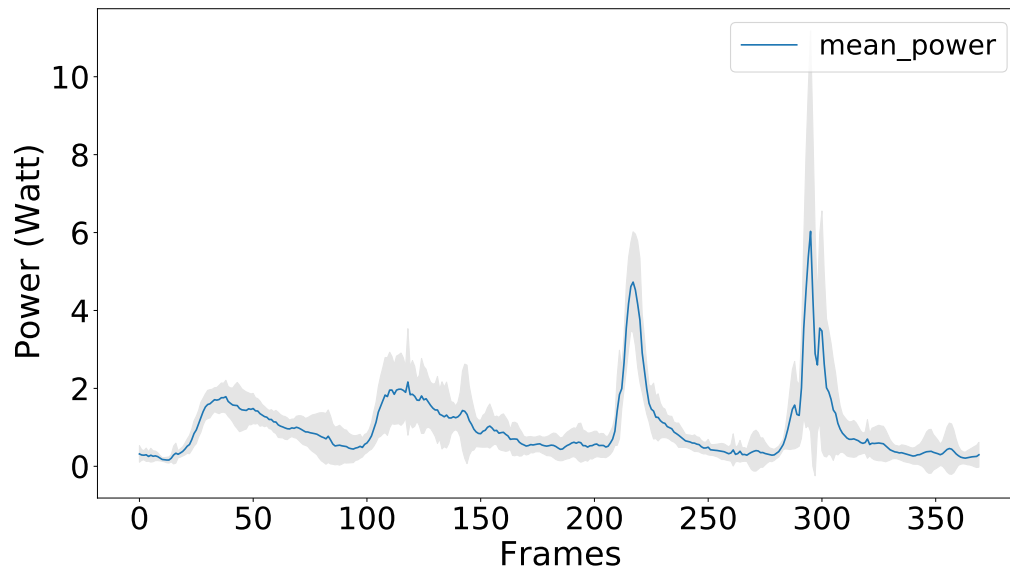

Figure 2: **The mean of power at each frame** Nine subjects traced path1 for 5 times each. The plot shows the joints' power at each frame of different subjects. The small standard deviation means that different subjects had similarity power patterns while tracing the same curve, which shows that the curve has points of difficulty in tracing shared by the subjects. Psth 1 is a simple so it can be traced quickly, but the observation of correlated effort representative of patterns in tracing other curves

280 **Average energy cost of five repetitions.** Although there are qualitative  
281 similarities in the difficult points on the curve, the totalled costs of the traces  
282 differ across different subjects. This result is shown in in Fig. 3, which  
283 reports the cost per subject. The total energy of joints including the residual  
284 components is shown in blue and the residual component is shown separately  
285 in orange. When reporting the costs of the traces, we always use the total  
286 cost shown here in blue, which includes the orange residual component.

287 As shown in Fig. 3, the by far largest cost of the tracing movement is  
288 the component owing to the joint torques that are producing the kinetic

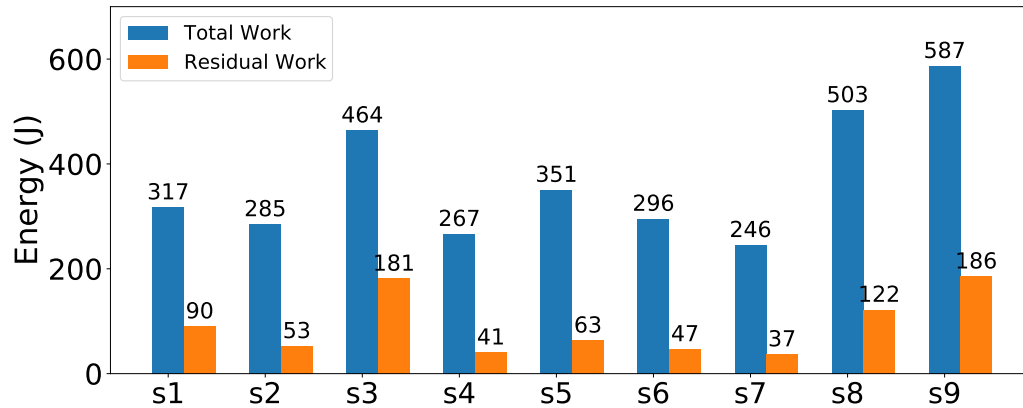

Figure 3: **The average energy cost of tracing and residual force component** Each subject traced path1 with 5 repeats. The horizontal labels indicate the corresponding subjects, e.g. "S1" represents the subject1. The total cost is shown in blue and the portion of that cost due to residual forces is shown in orange, A low cost in residual forces usually signifies that the dynamic model is a good match for that subject's kinematic data.

289 trajectories, and the additional cost of the residual from the inverse dynamic  
290 calculation is small. In the human system, this residual is most prominently  
291 due to the vestibular system but just how the vestibular connects to the  
292 muscular system is not modeled by the human dynamic model. Instead we  
293 implemented a provisional system of torques referred to a coordinate system  
294 positioned and the center of mass to maintain balance.

295 **Residual forces.** All our subjects' costs are derived from the same inverse  
296 dynamics technique [14], which combines measured kinematics and external  
297 forces to calculate net joint torques in a rigid body linked segment model. A  
298 feature of the dynamic method is that it can reduce potential errors, both  
299 in the matches of the motion capture suit and the model. Analogous to



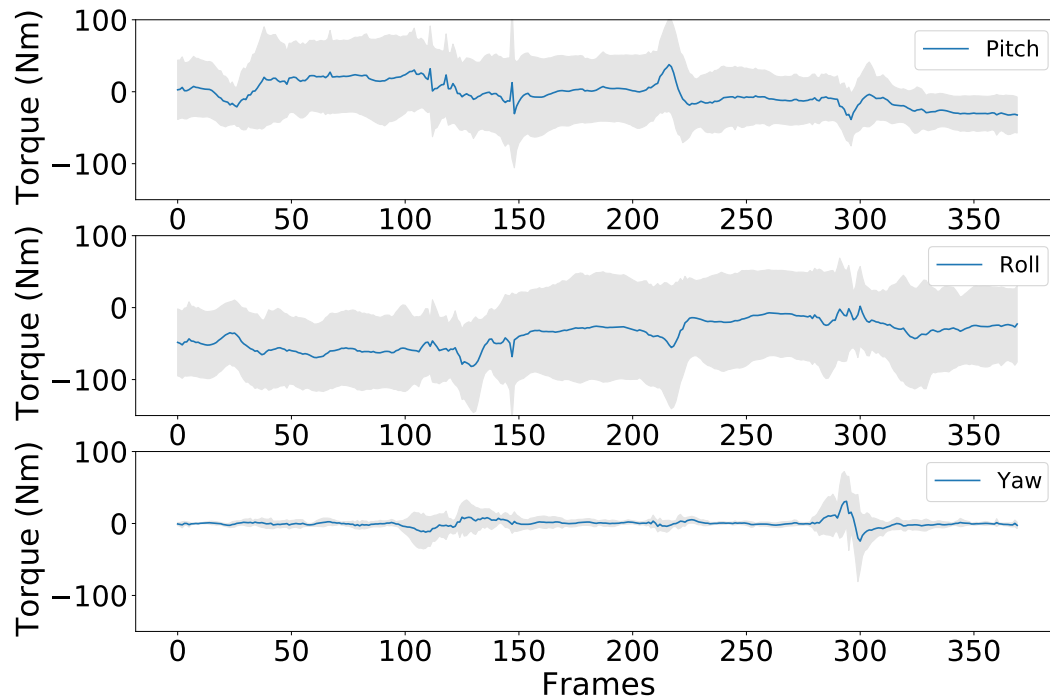

Figure 4: **Residual torque magnitudes**Errors in the calculation of joint torques from the inverse dynamics require additional torques for stabilization. Shown here are the magnitude of the torques seen in pitch roll and yaw axes. )

300 the human body's ligament structure to join joints, some leeway is allowed  
301 in the ,model joints in the integration process.Nonetheless, even after these  
302 adjustments, some errors remain. In the model, the main source of the  
303 residual forces is usually attributable inaccuracies in the matches between the  
304 motion capture suit makers and their match with their corresponding points  
305 on the model. This is commonly resolved by introducing 'residual forces'  
306 which compensate for this problem . This resolution with a dichotomy of  
307 forces is analogous to the human system which combines feed forward lateral

308 pathway forces with medial pathway feedback forces

309 The temporal cost of such residuals is small as shown in Fig. 4 that  
310 shows the distributions of magnitudes of the residual in orange in Fig. 4  
311 for the nine subjects tracing tracing path1. For the model, roll torques  
312 are the largest, with pitch torques second. Both pitch and roll torques can  
313 exploit the background of the skeleton's inverse pendulum construction for  
314 walking. These torques are necessary, but their magnitudes are small and not  
315 a factor in distinguishing original and perturbed costs. Residual torques are  
316 applied at the figure's waist, which is next to the center of mass. The small  
317 magnitudes measured for the residual, together the observation that that  
318 the residual is similar for the original and perturbed paths argues against  
319 the residual torques being a factor in the analysis.

### 320 *3.2. Energy cost analysis of tracing individual paths*

321 **Energy cost of tracing nine paths.** Although there are similar costs per  
322 subject in the sample trace, this arrangement does not carry over to the  
323 comparison between paths, which has larger differences. We hypothesized  
324 that the cost should scale as the length of the path  $a$  as shown in Figure 5,  
325 which shows the average energetic cost of tracing the nine different paths.  
326 The paths differ in tracing cost, but the costs of tracing each path by each  
327 subject, normalized by body weight, are very similar and scale with the  
328 length of the paths.

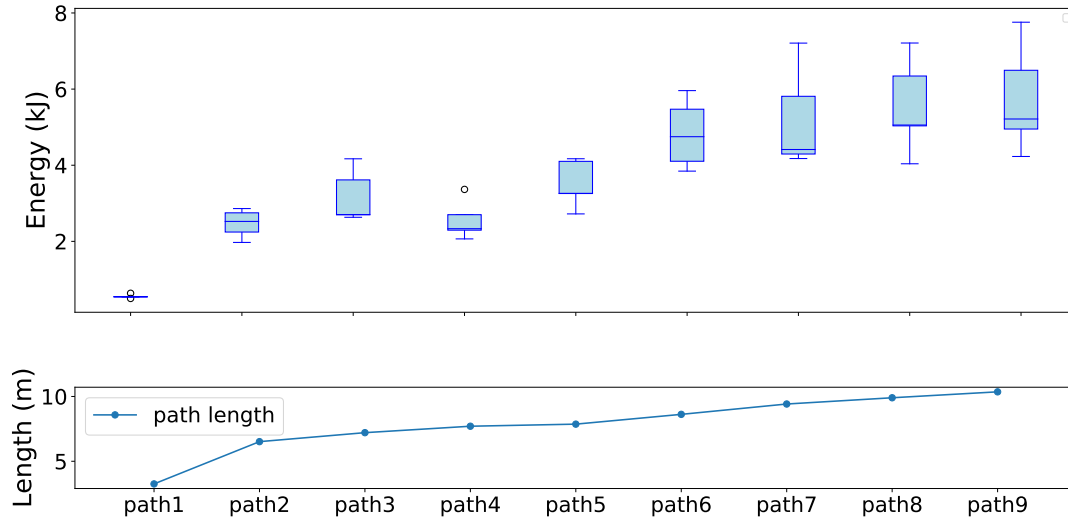

Figure 5: **Cost of tracing** These results portray the possibility that the costs vary across the best-fit five subjects. The statistics show that each path traced has a unique cost that distinguishes it from the rest.

329 **Tracing perturbation.** Given these regularities, The next step is to evalu-  
330 ate the significance of perturbations in the tracing protocol. The hypothesis  
331 is that if the tracing postures are chosen to be of minimum energy, chang-  
332 ing the configuration away from the original tracing situation should incur  
333 a cost, and that is what happens. The first perturbation tests changes in  
334 model marker parameters. A marker is changed by a small delta and this is  
335 a constraint that is satisfied while the model traces the paths. The way this  
336 is implemented is to have the model's right finger follow the cue on the curve  
337 as before. The kinematics is as it was for the unperturbed trace, but there  
338 is enough freedom so that the dynamics can adapt to follow the perturbed

339 trace.

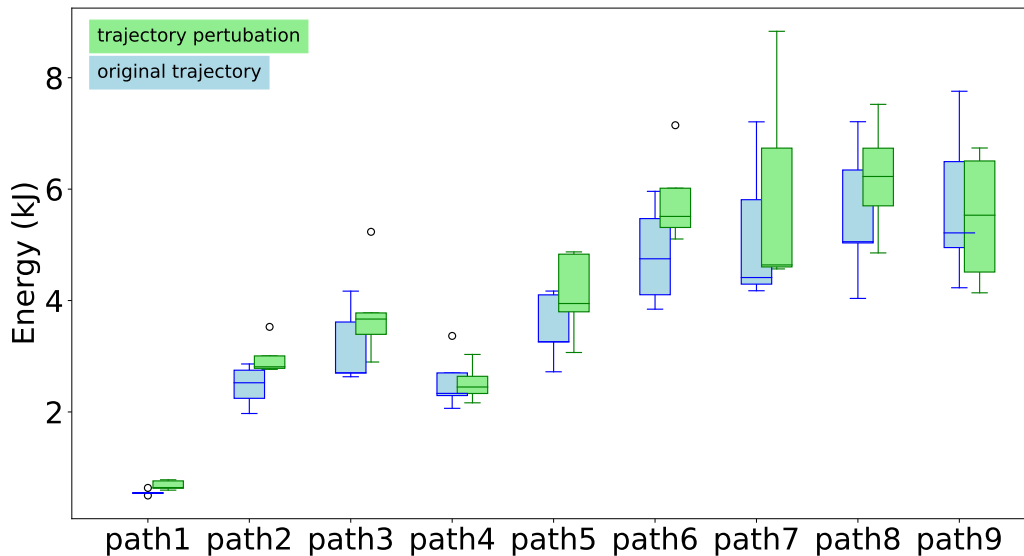

Figure 6: **Cost of tracing perturbed model** Cost of tracing each of the nine paths with a perturbations in the model elbow parameter. The elbow was moved up 3.5cm. This shows that for all the paths and the averages across subject tracers, the original path is always the least expensive. moreover the differences are highly significant

340 For in each trace the elbow marker is raised by 5 cm. The rest of the  
341 system can adapt is the way dictated by the dynamic constraints. The result  
342 is shown in Fig.6. Each subject traced each path five times and the resultant  
343 costs are averaged. It is seen that although there are variations in the cost  
344 across the repeated traces, the cost of using the perturbed model parameters  
345 is significantly higher that the original. Note that outside of the changes,  
346 the rest of the model solves the inverse dynamic model with the unperturbed  
347 parameters, and thus the model has very large degrees of freedom at its

348 proposal.

349 In the model perturbation experiment, the system must followed the orig-  
350 inal paths used in the nominal case. The second case makes adjustments in  
351 the traced path. Some effects in a displaced can be intuited. For example, if  
352 a subject has to reach over their head during the trace, it can be expected  
353 that lowering the traced path would result in a cost savings. For this reason,  
354 we chose path perturbations in the horizontal plane. Two such perturba-  
355 tions were used: a 5centimeter dis[placement and a 5 centimeter rightward  
356 displacement.

357 Figure 7 shows the result of averaging the traces across the displaced paths  
358 averaged across each subject normalized by body weight. Each original path  
359 is seen to be the lowest cost.

360 Here again the results are striking. Although there is some overlap, for all  
361 curves, the originally more economical than the displacements. The observa-  
362 tion that the averages of all the perturbed costs are more than the average  
363 cost of their original progenitors strongly suggests that energy cost is the  
364 factor in the choice of tracing postures. Figure 8 shows that all the three  
365 sets of tests are significant to the  $p=0.01$  level.

366 Given the dynamics dichotomy, a natural question that rises concerns  
367 the magnitude of the extra torques in the perturbation cases. Are the extra  
368 costs carried by the dynamic model or the residual? This is easily answered  
369 by interrogating the simulation, and it turns out that that dynamics models  
370 contribution is overwhelming. This is shown in Fig 9.

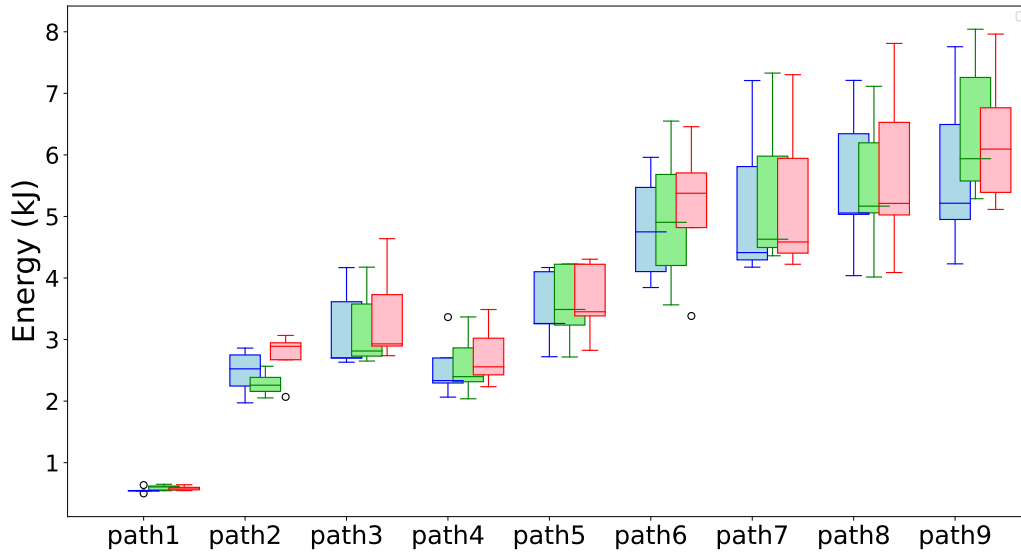

Figure 7: **Cost of tracing perturbed paths** Each of the nine paths have the two perturbations of 5 cm: left in green, right in red. This main result shows that for both averages across subject traces, the original path is always the least expensive.

371 If the constraints on the dynamics were extremely stiff then the model  
372 would have no course other than tracing an exact copy of the unconstrained  
373 trajectory and let the residual torques contribute the need difference. How-  
374 ever, the markers on the body for these experiments are limited to 15~18  
375 of key points, leaving the extra degrees of freedom to be determined by the  
376 dynamics. Moreover the torque computation, to model the reality of muscles  
377 [60] uses spring constrains at each joint degree of freedom. Finally the  
378 figure is forced to contact the displaced path, and the large features of the  
379 movement such as footfalls are the same, leaving the dynamics to fill in the  
380 rest.

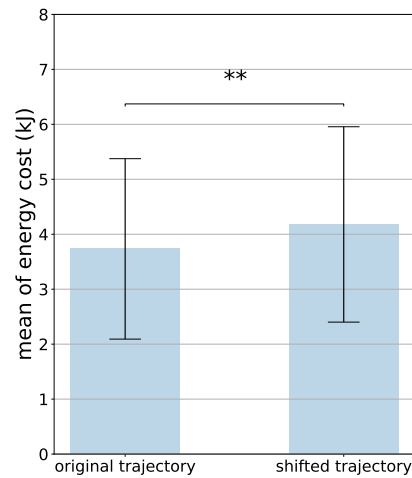

(a) shifted model marker

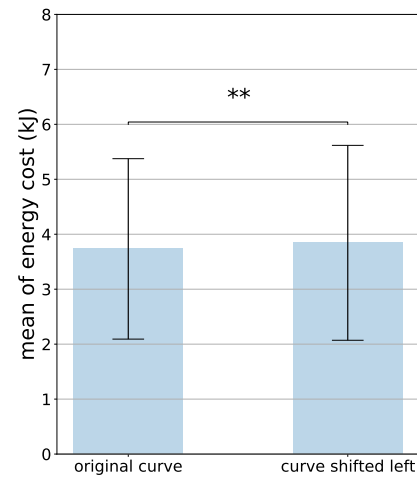

(b) shifted curve (left)

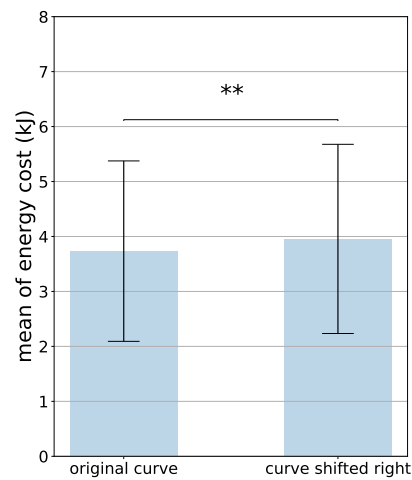

(c) shifted curve (right)

Figure 8: Cost of tracing perturbed paths. Each of the nine paths have three perturbations. (a) Perturbed model marker. (b) curve perturbed 5 cm to the left (b) curve perturbed 5 cm to the right. This main result shows that for both averages across subject traces, the original path is always the least expensive. All three manipulations are different with a significance at the  $p=0.01$  level.

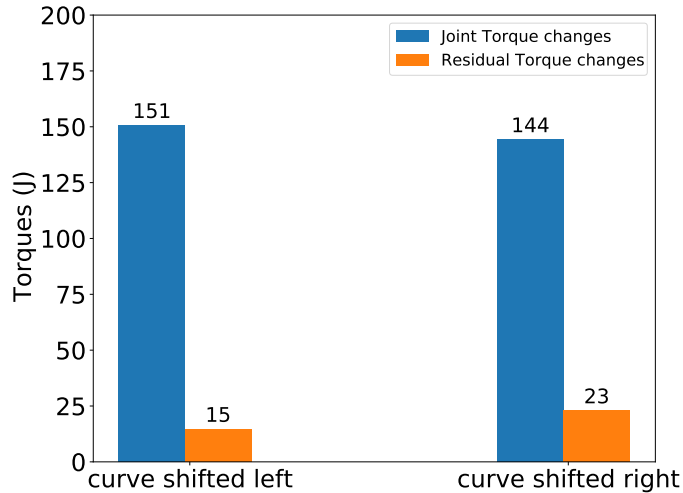

Figure 9: **Extra torques** The extra cost of tracing each of the nine paths with left and right perturbations in the traced path summed over five repeated traces

## 381 Discussion

382 Given that the cost of the movements is a significant fraction of a  
383 human's caloric budget [61] one might expect that humans would exhibit  
384 common low cost postures. This turns out to be the case for stereotypical  
385 situations such as reaching or walking on a planar surface, but arbitrary whole  
386 movements have been less studied so the expectations are more open. Thus it  
387 was a surprise to measure arbitrary movements in a large scale tracing task  
388 and find markedly common posture sequences used by all tested subjects  
389 [26]. An obvious possibility for the similar posture sequences is energetic  
390 cost, especially since there were no complex constraints in the movements  
391 and no constraints in the time to perform the traces.

392 Our stimulations extend the kinematic finding to show that tests of hu-  
393 man dynamics provide evidence that movements are chosen on the basis of



394 economic energetic costs. The initial measurements were unsurprising. The  
395 cost of tracing scales monotonically with the length of a traced path as ex-  
396 pected and the necessary residual forces, as would be expected from the  
397 human's vestibular system and others, given that the subjects had to choose  
398 their movements, were relatively small.

399 The main substantive results are that subjects' traces of each of nine space  
400 paths all have minimal costs with respect to local perturbations. One manip-  
401 ulation introduced perturbations in their kinematic variables. The subjects  
402 traced the path but their model with small displacements in kinematic mark-  
403 ers. The other experiment used local horizontal displacements of the paths.  
404 Vertical were not used as they can be equivocal as the displacements can  
405 interact with the different body sizes as when a short subject has to reach  
406 up to an uncomfortable height. But outside of this caveat, the all the data  
407 can be interpreted as the the tracing posture sequences are selected on the  
408 basis of energetic cost.

409 The hypothesis that humans use minimum cost movement trajectories  
410 was tested by the use of a human dynamic model that leverages a major  
411 innovation in dynamics computation that allows the the recover torques  
412 from kinematic data. The model also provides a fresh perspective for dif-  
413 ferent interpretations of the representations of movements in the brain's mo-  
414 tor cortex. The motor cortex has been extensively researched over many  
415 decades [62], providing many different perspectives as to its complex struc-  
416 ture [63, 64, 65, 66], and the computational modeling cannot be expected to

417 be definitive but it can endorse certain perspectives, which we attempt to  
418 do here. The focus is in presenting that our model endorses the use cortical  
419 area M1 as the site of kinematics representing posture changes in multiple  
420 joints.

421 Our perspective follows from computer science's classic dichotomy be-  
422 tween tables and functions in computation. Computing something as simple  
423 as a trigonometric sine function, one has the option of pre-computing sine  
424 values at some resolution and memorizing them in a table for instant access or  
425 computing them on line using the slower series expansions for computing the  
426 values as needed. These differences are placed in sharper relief in the human  
427 system as the on-line aspect is much more formidable owing to the brains  
428 relatively slow circuitry. In silicon, processing times are over million faster  
429 so the trade-off tends to favor computed functions. In human biology, the  
430 vastly slower computations favor pre-computation and tabular formats. the  
431 torques for a posture change in an online fashion or pre-compute descriptions  
432 ahead of time and save them in memory until needed. The dynamics models  
433 advance informs this choice.

434 These broad computational realities favor memorization, they can also  
435 evaluate the different suggestions that have been proposed for motor cor-  
436 tex. The neurobiology of motor cortex also exhibits memorization but also  
437 adds another between what we will call *local* and *global* memories. Local  
438 memories have been the standard ever since [67] who showed body maps of  
439 local movements and somatosensation. Homunculus maps reflect the reality

440 of local stimulation, but eschew any larger picture. The global picture owes  
441 its discovery to [68] who show that cortical stimulation could larger posture  
442 movements directed to external goals. In this organization the neural maps  
443 produce cooperative movements reflective of the animal's task. This orga-  
444 nization has been refined by [69]. Using larger amplitude altering current  
445 stimulation, Graziano produced large global posture movements that he was  
446 able to classify in into five behaviors. A similar point made with very dif-  
447 ferent methodology hasbeen made by [70]. Studies using a balance platform  
448 show that humans use muscles is stereo-logical groups.

449 The global movement data together with the modeling complexity of  
450 generating the movements makes it likely that they are pre-computed and  
451 save in motor cortex in some form, but what exactly does this take?

452 The dynamic model argues for parsing the information that can be pre-  
453 planned and has reliable generality such as kinematics [71] and stiffness [72].  
454 These parameters are distinguished by having to be pre-planned. Before the  
455 movement, many of the details of the movement, such as surface properties  
456 are not known and have to be only estimated. Thus the invariant components  
457 of the movement are most likely to be memorized.

458 In contrast, the torques are likely left for the spinal cord. There are many  
459 reasons for this. 1) The spinal cord contains a vast store of programmable  
460 reflexes that handle the fastest responses. 2 The spinal cord integrates the  
461 commands from the brain's lateral system used by the cortex and medial  
462 system used by the residual torques like those from the vestibular system.

463 3) While footfalls can be estimated kinematically, the complex interactions  
464 to handle the contact with an uncertain surface need use feedback loops  
465 given an kinematic estimate just as a starting point. 4) Given the torques  
466 are implied by the kinematics, any manipulation with a kinematic correlate  
467 e.g.[73] may have kinematics as its interpretation 5) It has been shown that  
468 the extraction of a movement by the cortex has its own dynamic process  
469 which is not instantaneous [74], but nonetheless is decoupled with the mea-  
470 sure of muscle activation with electromyography. This observation, together  
471 with another that shows supplementary motor cortex is correlated with the  
472 timing of movement onset [75], suggest that the motor cortecies, may be fo-  
473 cused on the overhead in movement planning than the fine-grained movement  
474 dynamics.

## 475 4. Methods

### 476 4.1. *Virtual tracing experiment*

477 For the original kinematic data capture we designed a virtual whole-body  
478 tracing experiment to elicit natural movements under common goals [26].  
479 Subjects wore a virtual-reality helmet, Oculus Rift [76], to see a virtual three  
480 dimensional interior room with a dojo backdrop via stereo video. They were  
481 required to trace a series of paths positioned at fixed locations in the virtual  
482 environment. The movements of their bodies and variables relevant to the  
483 tasks were simultaneously recorded using the PhaseSpace motion capture  
484 system [77]. The WorldViz Vizard software package [78] both controlled the

485 virtual tracing protocol and the recording of the motion capture data. Fig  
486 10 shows the virtual environment setup. Fig 1 shows the nine paths that  
487 subjects traced.

488 **Data pos-processing.** For some frames the motion capture system is un-  
489 able to determine the 3-dimensional location of some markers, thus raw mo-  
490 tion capture data usually contains some segments of signal loss (dropouts).  
491 Dropouts are relatively infrequent in practice but can occur over significant  
492 temporal intervals, which makes linear interpolation a poor choice for recon-  
493 structing the raw motion capture data. In this experiment, trajectory-based  
494 singular value threshold was implemented to reconstruct missing marker data  
495 with a minimal impact on its statistical structure. The data for each subject  
496 was interpolated using a separate matrix completion model.

497 In addition to the data interpolation process if a participant did not trace  
498 the path successfully, e.g. their index fingers were too far behind the tracing  
499 points at a certain frame, or a recording of a tracing trial failed, e.g. too  
500 many markers were off during a tracing which leads to a extremely large  
501 joint torques, we would consider this tracing invalid and the data would not  
502 be used.

#### 503 4.2. *Human dynamic model*

504 To compute the energy cost of subjects tracing paths, we used our human  
505 dynamic model [58]. By replaying the virtual tracing experiment's kinematic  
506 data, we can compute can the joints' properties, e.g. torques and angles, at

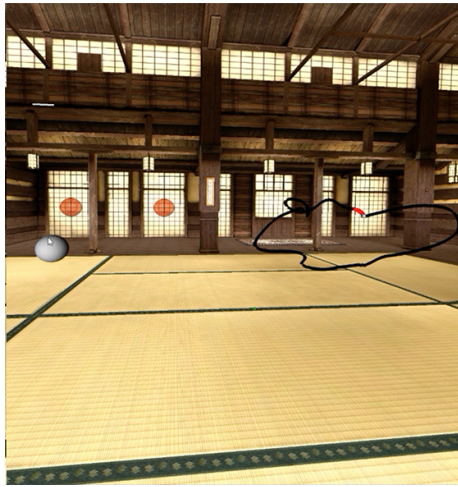

(a) Before tracing

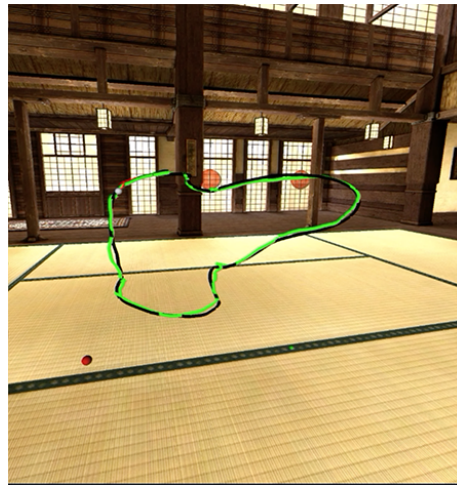

(b) After tracing

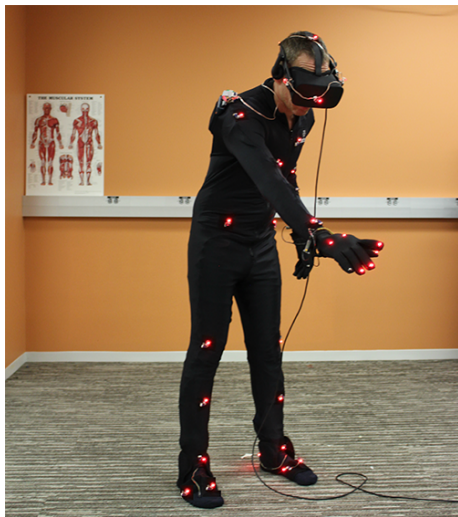

(c) A subject doing the tracing task

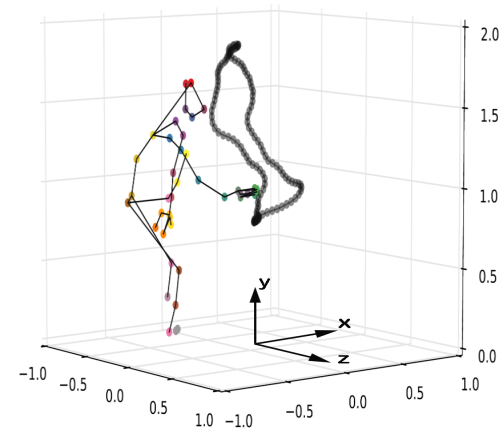

(d) The skeleton plot of the subject

Figure 10: the virtual environment setup. (a) shows a full view of a path, denoted by a black path, and the starting position, denoted by a large white sphere. The small white sphere on the path at the end of a red segment is the tracing target sphere. (b) depicts the scene when a trial is finished. The green path is the actual tracing trajectory generated by a subject. (c) illustrates a subject in the act of tracing a path in the laboratory's motion capture 2 x 2 x 2 meter volume. and (d) shows the lab coordinate system. The scale on the graph is in meters. The the subject's skeleton and the traced path in the 3D space are plotted. The color dots correspond to a subset of the fifty active-pulse LED markers on the suit and the virtual-reality helmet. Related to Figure 2.

507 frame rates. The human dynamic model is built on top of the ODE physics  
 508 engine [79]. It consists of a collection of rigid bodies connected by joint.  
 509 Each joint connects two rigid bodies with anchor points (center of rotation)  
 510 defined in the reference frame of both bodies. The locations of these anchor  
 511 points determine the segment dimensions (bone lengths) of the character  
 512 model. Fig. 11 shows the number of body segments and topology of the  
 513 human dynamic model.

B

| Joint      | Part 1      | Part 2      | DOF/joint | Total DOF |
|------------|-------------|-------------|-----------|-----------|
| Cervical   | Head        | Neck        | 3         | 3         |
| Thoracic   | Neck        | Upper Torso | 3         | 3         |
| Lumbar     | Upper Torso | Lower Torso | 3         | 3         |
| Sacral     | Lower Torso | Pelvis      | 3         | 3         |
| c.Clavicle | Upper Torso | c.Collar    | 3         | 6         |
| c.Shoulder | c.Collar    | c.Upper Arm | 3         | 6         |
| c.Elbow    | c.Upper Arm | c.Lower Arm | 2         | 4         |
| c.Wrist    | c.Lower Arm | c.Hand      | 2         | 4         |
| c.Hip      | c.Pelvis    | c.Upper.Leg | 3         | 6         |
| c.Knee     | c.Upper Leg | c.Lower Leg | 2         | 4         |
| c.Ankle    | c.Lower Leg | c.Heel      | 2         | 4         |
| c.Tarsal   | c.Heel      | c.Sesamoid  | 1         | 2         |

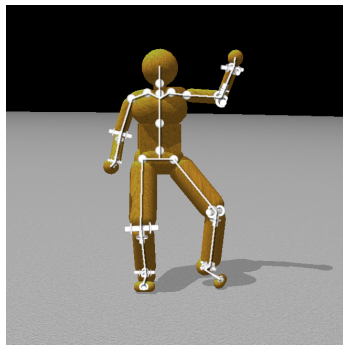

Figure 11: **The 48 internal DOF Model** A. Four ball-and-socket joints connect five body-segments along the spine from the head to the waist. Ball-and-socket joints are also used at the collar-bone, shoulder, and hip. B. A summary of the joints used in the model. c. = chiral: there are two of each of these joints (left and right). Universal joints are used at the elbows, wrists, knees, and ankles. Hinge joints connect the toes to the heels. All joints limit the range of motion to angles plausible for human movement. Our model assumes that joint DOFs summarize the effects of component muscles.

514 Fig. 12 shows a interface that allows the simulation of human movements  
 515 via a multi-purpose graphical interface for analyzing movement data cap-  
 516 tured through interaction with the virtual environment. With this tool, it

517 is possible to interactively fit a model to motion capture data, dynamically  
 518 adjust parameters to test different effects, and visualize the results of kine-  
 519 matic and dynamic analysis, such as the example in Fig 13, which shows  
 520 a four stages in a tracing sequence made originally by a participant of the  
 521 virtual tracing experiment and recreated by applying the inverse dynamics  
 522 method using this tool.

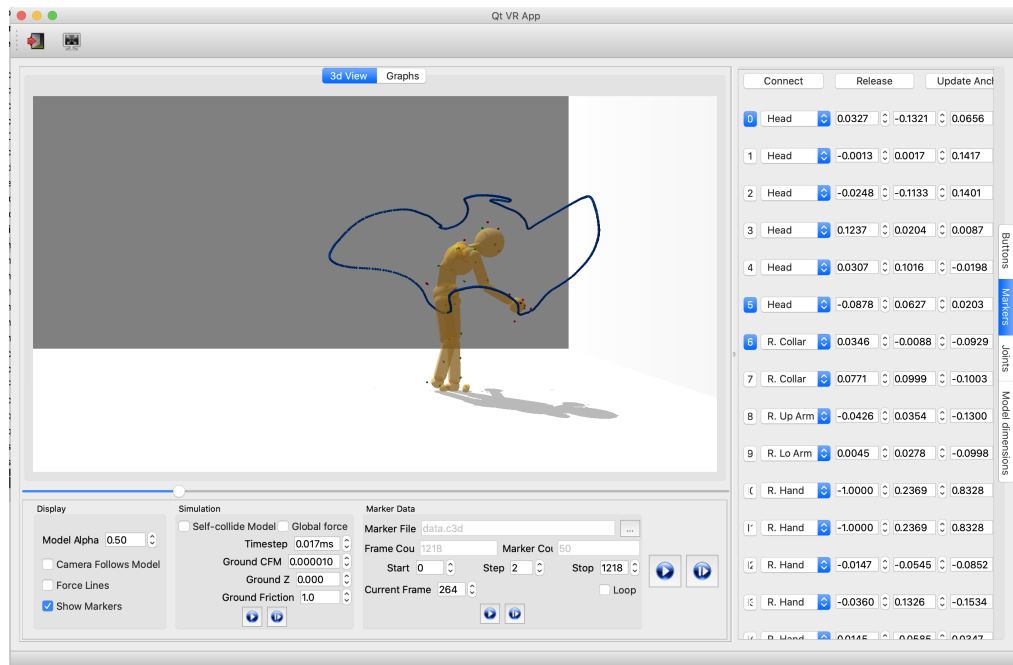

Figure 12: Our analysis tools use the physics engine to compute inverse kinematics and inverse dynamics. They also support various visualizations of relevant data and control for analyzing and producing physically-based movements. The programmed parameters of the model consist of its joints and its 3D marker positions. For example, the right column represents the positions of the markers relative to their corresponding body segments, e.g. the first row shows the information of marker1: 1) "1" represents the marker index, 2) "head" means marker 1 is attaching to the "head" body segment, 3) the remaining three float numbers are marker1's relative position.



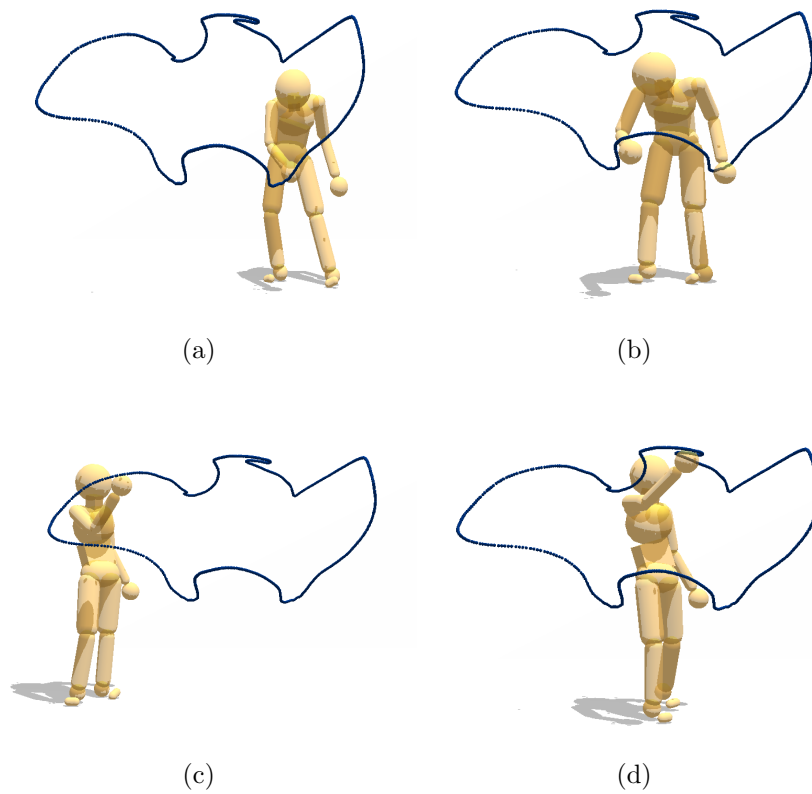

Figure 13: **Model capability illustration.** Four points in a tracing sequence reproduced with physics-engine-based inverse dynamics using recorded motion capture data from a human subject.

523 **Model fitting.** The quality of the fit between the data and the model can  
524 significantly influence the energy computation. The technique for fitting  
525 a model to data begins with a character model that serves as a template,  
526 Fig. 12, providing the number of body segments and topology of the model.  
527 We further require that labeled markers used in motion capture be assigned  
528 to specific model segments. It may be straightforward to derive these using  
529 a technique such as in [80, 81]. However, it is also not difficult to do by  
530 hand. It would become tedious if one had to go through the process for  
531 many different models. Fortunately, the motion capture suit typically puts  
532 the markers on the same body segments, even if they are in slightly different  
533 places and the body segments have different dimensions.

#### 534 4.3. Energy cost computation

535 The centerpiece of the analysis depends critically on the definition of a  
536 posture. At each frame, posture is defined as a vector of the joint torques  
537 and angles of each of  $N$  joints ( $N = 22$  in our dynamic human model). The  
538 posture  $p$  at a frame is a 6n-dimensional column vector presenting the joints  
539 properties of the  $i$  th participant, thus

$$\mathbf{p} = [\mathbf{j}_1, \mathbf{j}_2, \dots, \mathbf{j}_N] \quad (1)$$

$$\mathbf{j}_i = (\boldsymbol{\tau}_i, \mathbf{a}_i) \quad (2)$$

540 where  $\boldsymbol{\tau}_i = (\tau_{i_x}, \tau_{i_y}, \tau_{i_z})$  and  $\mathbf{a}_i = (a_{i_x}, a_{i_y}, a_{i_z})$  represents the torques and  
541 angles of the  $i$  th joint at a frame respectively and  $i = 1, 2, \dots, N$ . For the

542 joints whttps://www.overleaf.com/project/5f25a6a28109fa0001d5233chich have  
543 less than three dimensions, e.g. hinge joints, universal Joints, the values at  
544 unused dimension were assigned zero.

545 The power  $W$  of  $i$ th joint at a frame  $t$  is a scale and equals to the inner  
546 product of its torque  $\boldsymbol{\tau}_i$  and its angular velocity  $\boldsymbol{\omega}_i$ , thus

$$\boldsymbol{\omega}_i(t) = \mathbf{a}_i(t) - \mathbf{a}_i(t - 1) \quad (3)$$

$$W_i(t) = \boldsymbol{\tau}_i(t) \cdot \boldsymbol{\omega}_i(t) \quad (4)$$

547 Therefore the power of a posture at frame  $t$  is presented as:

$$W(t) = \sum_{i=1}^N W_i(t)$$

548 Assuming it takes a participant  $T$  frames to trace a path, then the total  
549 energy cost  $E$  of the participant tracing a path is:

$$E = \sum_{t=1}^T W(t)$$

550 The energy cost analysis is naturally organized into three separate stages.  
551 Initially, we analyze the subjects energy cost and residual torques of tracing  
552 path1 which is the simplest path. Next, we computed the tracing cost of all  
553 nine paths. To compare the energy cost of tracing a path across subjects, we

554 computed the average energy cost for all five repeated traces of each subject.  
555 Finally, we measured the tracing cost of perturbed participant's trajectories  
556 and perturbed paths.

## 557 **Acknowledgments**

558 This research was supported by National Science Foundation grant CNS1446578  
559 and National Institutes of Health R01 RR09283.

## 560 **Declaration of Interests**

561 The authors have no financial or personal relationships with other people  
562 or organizations that could inappropriately influence their work. The authors  
563 declare no competing interests.

## 564 **References**

- 565 [1] Delp SL, Anderson FC, Arnold AS, Loan P, Habib A, John CT, et al.  
566 OpenSim: open-source software to create and analyze dynamic sim-  
567 ulations of movement. *IEEE transactions on biomedical engineering*.  
568 2007;54(11):1940–1950.
- 569 [2] Kidziński Ł, Yang B, Hicks JL, Rajagopal A, Delp SL, Schwartz MH.  
570 Deep neural networks enable quantitative movement analysis using  
571 single-camera videos. *Nature communications*. 2020;11(1):1–10.

- 572 [3] Shadmehr R, Ahmed AA. Vigor: Neuroeconomics of Movement Control.  
573 MIT Press; 2020.
- 574 [4] Callahan DM, Umberger BR, Kent-Braun JA. A computational model  
575 of torque generation: neural, contractile, metabolic and musculoskeletal  
576 components. *PloS one*. 2013;8(2):e56013.
- 577 [5] Loeb GE, Tsianos GA. Major remaining gaps in models of sensorimotor  
578 systems. *Frontiers in computational neuroscience*. 2015;9:70.
- 579 [6] Erez T, Tassa Y, Todorov E. Simulation tools for model-based robotics:  
580 Comparison of bullet, havok, mujoco, ode and physx. In: 2015 IEEE in-  
581 ternational conference on robotics and automation (ICRA). IEEE; 2015.  
582 p. 4397–4404.
- 583 [7] Todorov E, Erez T, Tassa Y. Mujoco: A physics engine for model-based  
584 control. In: 2012 IEEE/RSJ International Conference on Intelligent  
585 Robots and Systems. IEEE; 2012. p. 5026–5033.
- 586 [8] Burk D, Ingram JN, Franklin DW, Shadlen MN, Wolpert DM. Motor  
587 effort alters changes of mind in sensorimotor decision making. *PloS one*.  
588 2014;9(3):e92681.
- 589 [9] Kuo AD, Donelan JM. Dynamic principles of gait and their clinical  
590 implications. *Physical therapy*. 2010;90(2):157–174.
- 591 [10] Land WM, Rosenbaum DA, Seegelke C, Schack T. Whole-body posture

- 592        planning in anticipation of a manual prehension task: Prospective and  
593        retrospective effects. *Acta psychologica*. 2013;144(2):298–307.
- 594 [11] Rosenbaum DA, Brach M, Semenov A. Behavioral ecology meets motor  
595        behavior: Choosing between walking and reaching paths. *Journal of*  
596        *Motor Behavior*. 2011;43(2):131–136.
- 597 [12] Johnson L, Ballard DH. Efficient codes for inverse dynamics during  
598        walking. In: *Twenty-Eighth AAAI Conference on Artificial Intelligence*.  
599        Citeseer; 2014. .
- 600 [13] Cooper JL, Ballard D. Realtime, physics-based marker following. In:  
601        *International Conference on Motion in Games*. Springer; 2012. p. 350–  
602        361.
- 603 [14] Cooper JL. Analysis and synthesis of bipedal humanoid movement: a  
604        physical simulation approach. 2013;.
- 605 [15] Flash T, Henis E. Arm trajectory modifications during reaching towards  
606        visual targets. *Journal of cognitive Neuroscience*. 1991;3(3):220–230.
- 607 [16] Flash T, Hogan N. The coordination of arm movements: an ex-  
608        perimentally confirmed mathematical model. *Journal of neuroscience*.  
609        1985;5(7):1688–1703.
- 610 [17] Zarrugh M, Radcliffe C. Predicting metabolic cost of level walking.  
611        *European Journal of Applied Physiology and Occupational Physiology*.  
612        1978;38(3):215–223.

- 613 [18] Bongers RM, Zaal FT, Jeannerod M. Hand aperture patterns in pre-  
614 hension. *Human movement science*. 2012;31(3):487–501.
- 615 [19] Smeets JB, Martin J, Brenner E. Similarities between digits' move-  
616 ments in grasping, touching and pushing. *Experimental brain research*.  
617 2010;203(2):339–346.
- 618 [20] Wolpert DM, Ghahramani Z. Computational principles of movement  
619 neuroscience. *Nature neuroscience*. 2000;3(11s):1212.
- 620 [21] Ingram JN, Körding KP, Howard IS, Wolpert DM. The statistics of  
621 natural hand movements. *Experimental brain research*. 2008;188(2):223–  
622 236.
- 623 [22] de Grosbois J, Heath M, Tremblay L. Augmented feedback influences  
624 upper limb reaching movement times but does not explain violations of  
625 Fitts' Law. *Frontiers in psychology*. 2015;6:800.
- 626 [23] Körding K. Decision theory: what" should" the nervous system do?  
627 *Science*. 2007;318(5850):606–610.
- 628 [24] Bernstein NA. *The Co-ordination and Regulation of Movements*. Perga-  
629 mon Press; 1966.
- 630 [25] Latash ML, Scholz JP, Schönner G. Motor control strategies revealed in  
631 the structure of motor variability. *Exercise and sport sciences reviews*.  
632 2002;30(1):26–31.

- 633 [26] Liu L, Johnson L, Zohar O, Ballard DH. Humans Use Similar Posture  
634 Sequences in a Whole-Body Tracing Task. *Iscience*. 2019;19:860–871.
- 635 [27] Wolpert DM. Computational approaches to motor control. *Trends in*  
636 *cognitive sciences*. 1997;1(6):209–216.
- 637 [28] Todorov E. Optimality principles in sensorimotor control. *Nature neu-*  
638 *roscience*. 2004;7(9):907–915.
- 639 [29] Ralston HJ. Energy-speed relation and optimal speed during level  
640 walking. *Internationale Zeitschrift für Angewandte Physiologie Ein-*  
641 *schliesslich Arbeitsphysiologie*. 1958;17(4):277–283.
- 642 [30] Cotes J, Meade F. The energy expenditure and mechanical energy de-  
643 mand in walking. *Ergonomics*. 1960;3(2):97–119.
- 644 [31] Zarrugh M, Todd F, Ralston H. Optimization of energy expenditure  
645 during level walking. *European journal of applied physiology and occu-*  
646 *pational physiology*. 1974;33(4):293–306.
- 647 [32] Cavanagh PR, Williams KR. The effect of stride length variation on  
648 oxygen uptake during distance running. *Medicine and science in sports*  
649 *and exercise*. 1982;14(1):30.
- 650 [33] Holt KG, Hamill J, Andres RO. Predicting the minimal energy costs  
651 of human walking. *Medicine and science in sports and exercise*.  
652 1991;23(4):491–498.



- 653 [34] Minetti AE, Capelli C, Zamparo P, di Prampero PE, Saibene F. Ef-  
654 fects of stride frequency on mechanical power and energy expenditure of  
655 walking. *Medicine and Science in Sports and Exercise*. 1995;27(8):1194–  
656 1202.
- 657 [35] Donelan JM, Kram R, Kuo AD. Mechanical work for step-to-step tran-  
658 sitions is a major determinant of the metabolic cost of human walking.  
659 *Journal of Experimental Biology*. 2002;205(23):3717–3727.
- 660 [36] Umberger BR, Martin PE. Mechanical power and efficiency of level  
661 walking with different stride rates. *Journal of Experimental Biology*.  
662 2007;210(18):3255–3265.
- 663 [37] Maxwell Donelan J, Kram R, Arthur D K. Mechanical and metabolic  
664 determinants of the preferred step width in human walking. *Pro-  
665 ceedings of the Royal Society of London Series B: Biological Sciences*.  
666 2001;268(1480):1985–1992.
- 667 [38] Arellano CJ, Kram R. The effects of step width and arm swing on ener-  
668 getic cost and lateral balance during running. *Journal of biomechanics*.  
669 2011;44(7):1291–1295.
- 670 [39] Selinger JC, O’Connor SM, Wong JD, Donelan JM. Humans can con-  
671 tinuously optimize energetic cost during walking. *Current Biology*.  
672 2015;25(18):2452–2456.

- 673 [40] Sánchez N, Park S, Finley JM. Evidence of energetic optimization during  
674 adaptation differs for metabolic, mechanical, and perceptual estimates  
675 of energetic cost. *Scientific Reports*. 2017;7(1):1–14.
- 676 [41] Wong JD, Selinger JC, Donelan JM. Is natural variability in gait suf-  
677 ficient to initiate spontaneous energy optimization in human walking?  
678 *Journal of neurophysiology*. 2019;121(5):1848–1855.
- 679 [42] Margaria R. *Biomechanics and energetics of muscular exercise*. Oxford  
680 University Press, USA; 1976.
- 681 [43] Hoyt DF, Taylor CR. Gait and the energetics of locomotion in horses.  
682 *Nature*. 1981;292(5820):239–240.
- 683 [44] Huang HJ, Kram R, Ahmed AA. Reduction of metabolic cost dur-  
684 ing motor learning of arm reaching dynamics. *Journal of Neuroscience*.  
685 2012;32(6):2182–2190.
- 686 [45] Thoroughman KA, Shadmehr R. Electromyographic correlates of learn-  
687 ing an internal model of reaching movements. *Journal of Neuroscience*.  
688 1999;19(19):8573–8588.
- 689 [46] Franklin DW, Osu R, Burdet E, Kawato M, Milner TE. Adapta-  
690 tion to stable and unstable dynamics achieved by combined impedance  
691 control and inverse dynamics model. *Journal of neurophysiology*.  
692 2003;90(5):3270–3282.

- 693 [47] Srinivasan M, Ruina A. Computer optimization of a minimal biped  
694 model discovers walking and running. *Nature*. 2006;439(7072):72–75.
- 695 [48] Lee TT. Trajectory planning and control of a 3-link biped robot. In:  
696 Proceedings. 1988 IEEE International Conference on Robotics and Au-  
697 tomation. IEEE; 1988. p. 820–823.
- 698 [49] Čelikovský S, Anderle M. Stable walking gaits for a three-link pla-  
699 nar biped robot with two actuators based on the collocated virtual  
700 holonomic constraints and the cyclic unactuated variable. *IFAC-*  
701 *PapersOnLine*. 2018;51(22):378–385.
- 702 [50] Mu X, Wu Q. Synthesis of a complete sagittal gait cycle for a five-link  
703 biped robot. *Robotica*. 2003;21(5):581–587.
- 704 [51] Mu X, Wu Q. Sagittal gait synthesis for a five-link biped robot. In:  
705 Proceedings of the 2004 American Control Conference. vol. 5. IEEE;  
706 2004. p. 4004–4009.
- 707 [52] Mu X. Dynamics and Motion Regulation of a Five-link Biped Robot  
708 Walking in the sagittal plane. 2005;.
- 709 [53] Krishchenko A, Tkachev S, Fetisov D. Planar walking control for  
710 a five-link biped robot. *Computational Mathematics and Modeling*.  
711 2007;18(2):176–191.
- 712 [54] Mousavi PN, Bagheri A. Mathematical simulation of a seven link biped

- 713 robot on various surfaces and ZMP considerations. *Applied Mathematical*  
714 *Modelling*. 2007;31(1):18–37.
- 715 [55] Bajrami X, Murturi I. Kinematic Model of the seven link biped robot.  
716 *IJMET*. 2017;8(2):454–462.
- 717 [56] Grizzle JW, Chevallereau C, Ames AD, Sinnet RW. 3D bipedal robotic  
718 walking: models, feedback control, and open problems. *IFAC Proceed-*  
719 *ings Volumes*. 2010;43(14):505–532.
- 720 [57] Khusainov R, Shimchik I, Afanasyev I, Magid E. 3D modelling of biped  
721 robot locomotion with walking primitives approach in simulink envi-  
722 ronment. In: *Informatics in Control, Automation and Robotics 12th*  
723 *International Conference, ICINCO 2015 Colmar, France, July 21-23,*  
724 *2015 Revised Selected Papers*. Springer; 2016. p. 287–304.
- 725 [58] Liu L, Cooper JL, Ballard DH. Computational Modeling: Human Dy-  
726 namic Model. *bioRxiv*. 2020; Available from: [https://www.biorxiv.](https://www.biorxiv.org/content/early/2020/08/24/2020.08.23.262048)  
727 [org/content/early/2020/08/24/2020.08.23.262048](https://www.biorxiv.org/content/early/2020/08/24/2020.08.23.262048).
- 728 [59] Squire L, Berg D, Bloom FE, Du Lac S, Ghosh A, Spitzer NC. *Funda-*  
729 *mental neuroscience*. Academic Press; 2012.
- 730 [60] Hogan N. The mechanics of multi-joint posture and movement control.  
731 *Biological cybernetics*. 1985;52(5):315–331.
- 732 [61] Nelson WL. Physical principles for economies of skilled movements.  
733 *Biological cybernetics*. 1983;46(2):135–147.

- 734 [62] Lemon R. An enduring map of the motor cortex. *Experimental Physi-*  
735 *ology*. 2008;93(7):798.
- 736 [63] Fetz EE. recognizably coded in the activity of single neurons? *Behav-*  
737 *ioral and brain sciences*. 1992;p. 154.
- 738 [64] Evarts EV. Relation of pyramidal tract activity to force exerted during  
739 voluntary movement. *Journal of neurophysiology*. 1968;31(1):14–27.
- 740 [65] Scott SH. Inconvenient truths about neural processing in primary motor  
741 cortex. *The Journal of physiology*. 2008;586(5):1217–1224.
- 742 [66] Morrow MM, Pohlmeier EA, Miller LE. Control of muscle synergies by  
743 cortical ensembles. In: *Progress in Motor Control*. Springer; 2009. p.  
744 179–199.
- 745 [67] Penfield W, Boldrey E. Somatic motor and sensory representation in  
746 the cerebral cortex of man as studied by electrical stimulation. *Brain*.  
747 1937;60(4):389–443.
- 748 [68] Georgopoulos AP, Schwartz AB, Kettner RE. Neuronal population cod-  
749 ing of movement direction. *Science*. 1986;233(4771):1416–1419.
- 750 [69] Graziano MS, Taylor CS, Moore T. Complex movements evoked by  
751 microstimulation of precentral cortex. *Neuron*. 2002;34(5):841–851.
- 752 [70] Ting LH, Macpherson JM. A limited set of muscle synergies for

- 753 force control during a postural task. *Journal of neurophysiology*.  
754 2005;93(1):609–613.
- 755 [71] Rosenkranz K, Rothwell JC. Modulation of proprioceptive integration in  
756 the motor cortex shapes human motor learning. *Journal of Neuroscience*.  
757 2012;32(26):9000–9006.
- 758 [72] Reynolds C, Ashby P. Inhibition in the human motor cortex is reduced  
759 just before a voluntary contraction. *Neurology*. 1999;53(4):730–730.
- 760 [73] Kakei S, Hoffman DS, Strick PL. Muscle and movement representations  
761 in the primary motor cortex. *Science*. 1999;285(5436):2136–2139.
- 762 [74] Churchland MM, Cunningham JP, Kaufman MT, Ryu SI, Shenoy KV.  
763 Cortical preparatory activity: representation of movement or first cog  
764 in a dynamical machine? *Neuron*. 2010;68(3):387–400.
- 765 [75] CZimnik AJ, Haro, Churchland MM. Perturbation of Macaque Sup-  
766plementary Motor Area Produces Context-Independent Changes in  
767 the Probability of Movement Initiation. *Journl of Neuroscience*.  
768 2019;39(17):3217–3233.
- 769 [76] Desai PR, Desai PN, Ajmera KD, Mehta K. A review paper on oculus  
770 rift-a virtual reality headset. arXiv preprint arXiv:14081173. 2014;.
- 771 [77] PhaseSpace I. phaseSpace Motion Capture; 1994. Available from:  
772 <https://www.phasespace.com/>.

- 773 [78] WorldViz. Vizard 3 [Computer Software](Version 3). WorldViz Santa  
774 Barbara, CA; 2010.
- 775 [79] Smith R, et al. Open dynamics engine. 2005;.
- 776 [80] Kirk AG, O'Brien JF, Forsyth DA. Skeletal parameter estimation from  
777 optical motion capture data. In: 2005 IEEE Computer Society Confer-  
778 ence on Computer Vision and Pattern Recognition (CVPR'05). vol. 2.  
779 IEEE; 2005. p. 782–788.
- 780 [81] De Aguiar E, Theobalt C, Seidel HP. Automatic learning of articulated  
781 skeletons from 3d marker trajectories. In: International Symposium on  
782 Visual Computing. Springer; 2006. p. 485–494.
